# Supplementary material for: PRINS lncRNA Is a New Biomarker Candidate for HPV Infection and Prognosis of Head and Neck Squamous Cell Carcinomas
Source: PubMed Central journal article supplement (PMC7599931; doi:10.3390/diagnostics10100762), 2020-09-28
Supplement: diagnostics-10-00762-s001.pdf [file diagnostics-10-00762-s001.pdf]

**SUPPLEMENTARY MATERIAL:**

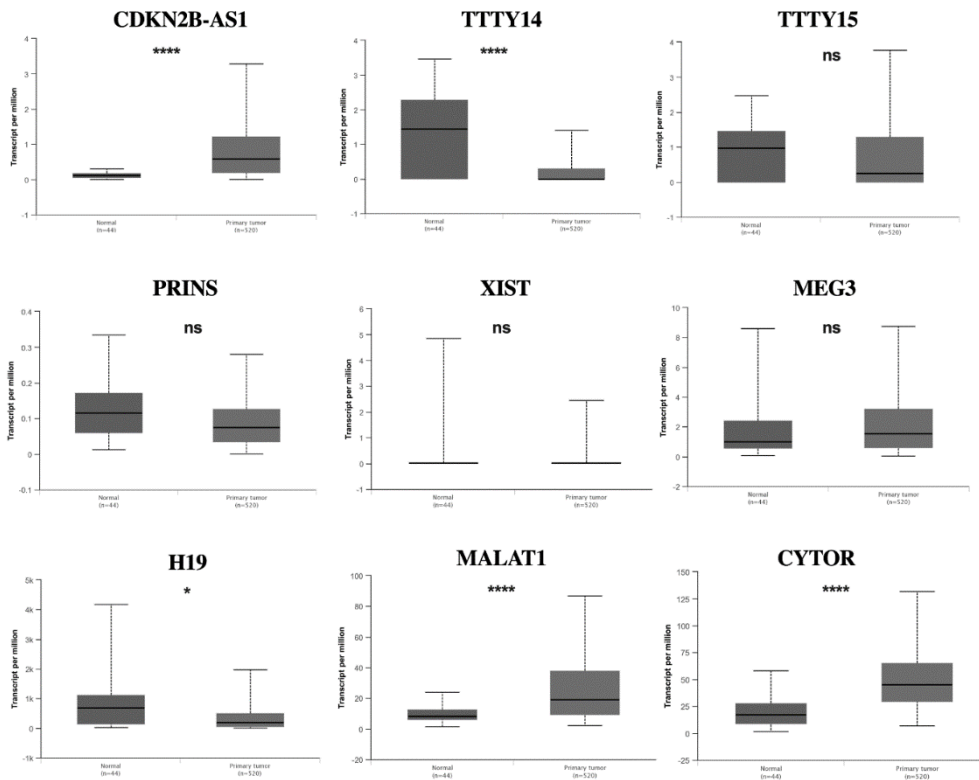

**Figure S1.** Expression levels of CDKN2B-AS1, TTTY14, TTTY15, PRINS, XIST, MEG3, H19, MALAT1, and CYTOR lncRNAs in normal tissue (n = 44) and primary tumor (n = 520) of HNSCC patients; graphs from UALCAN database, modified; Un-paired T-test. The graphs show median values presented as transcripts per million with lower and upper quartiles of boxes. ns: not significant, \* p < 0.05, \*\*\*\* p < 0.0001.

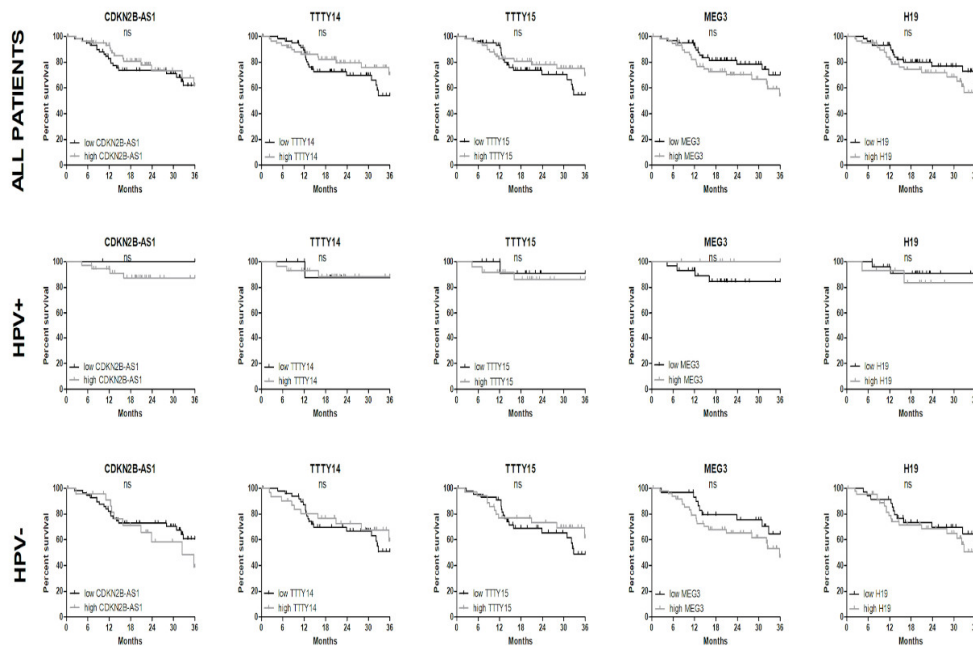

**Figure S2.** OS in all patients, HPV(+) and HPV(-) low and high expression levels of CDKN2B-AS1, TTTY14, TTTY15, MEG3 and H19 lncRNAs; a - Log-rank (Mantel-Cox) test; p < 0.05 considered as significant.

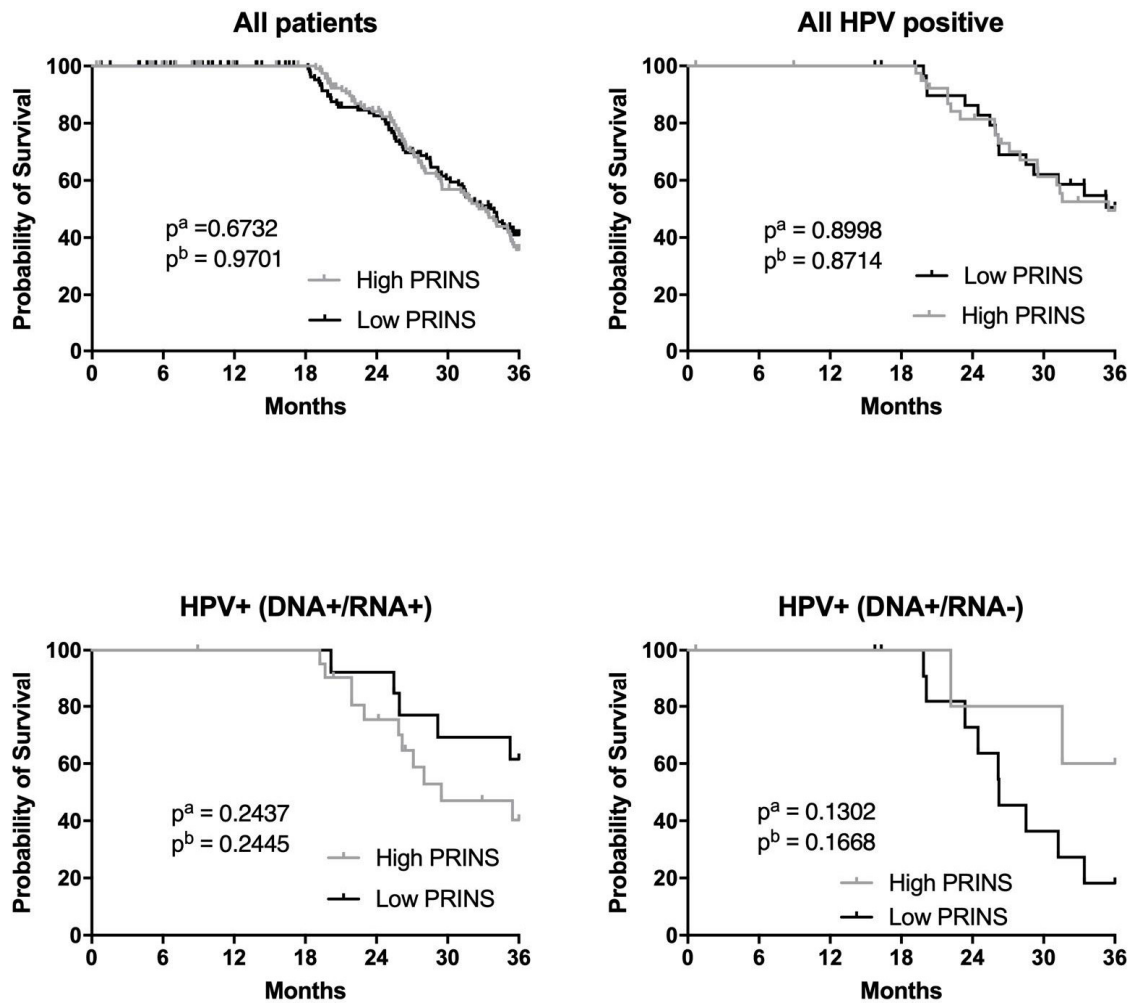

**Figure S3.** OS of all, HPV (+), HPV+ (DNA+/RNA+) and HPV+ (DNA+/RNA-) patients with low and high expression levels of PRINS based on GSE65858 data set;  $p^a$  - log-rank (Mantel-Cox) test;  $p^b$  - Gehan-Breslow-Wilcoxon Test;  $p < 0.05$  considered as significant.

**Table S1.** Characteristics of TCGA HNSCC patients examined in this study.

| Parameter |        | HPV(-)  | HPV(+)  | ALL<br>(HPV(-) and HPV(+)) |
|-----------|--------|---------|---------|----------------------------|
|           |        | [cases] | [cases] | [cases]                    |
| Age       | <55    | 25      | 16      | 41                         |
|           | >55    | 56      | 24      | 80                         |
|           | ND     | 0       | 0       | 0                          |
| Gender    | Female | 20      | 4       | 24                         |

|                                |              |    |    |    |
|--------------------------------|--------------|----|----|----|
|                                | Male         | 61 | 36 | 97 |
|                                | ND           | 0  | 0  | 0  |
| <b>Smoking</b>                 | Yes          | 58 | 24 | 82 |
|                                | No           | 23 | 15 | 38 |
|                                | ND           | 0  | 1  | 1  |
| <b>Alcohol consumption</b>     | Yes          | 60 | 30 | 90 |
|                                | No           | 19 | 9  | 28 |
|                                | ND           | 2  | 1  | 3  |
| <b>Grade</b>                   | G1+G2        | 59 | 15 | 74 |
|                                | G3+G4        | 20 | 15 | 35 |
|                                | ND           | 2  | 10 | 12 |
| <b>T-stage</b>                 | T1+T2        | 23 | 16 | 39 |
|                                | T3+T4        | 50 | 7  | 57 |
|                                | ND           | 8  | 17 | 25 |
| <b>N-stage</b>                 | N0           | 29 | 8  | 37 |
|                                | N1+N2<br>+N3 | 49 | 31 | 80 |
|                                | ND           | 3  | 1  | 4  |
| <b>Perineural invasion</b>     | Yes          | 44 | 3  | 47 |
|                                | No           | 31 | 14 | 45 |
|                                | ND           | 6  | 23 | 29 |
| <b>Angiolymphatic invasion</b> | Yes          | 32 | 10 | 42 |
|                                | No           | 36 | 6  | 42 |
|                                | ND           | 13 | 24 | 37 |

ND – no data

**Table S2.** The expression levels of lncRNAs in cancer and normal tissues. Data from UALCAN database.

|            | Tumor vs. Normal<br>[mean] | p-val    |
|------------|----------------------------|----------|
| CDKN2B-AS1 | 0.588 vs. 0.107            | 1.11e-16 |
| TTY14      | 0 vs. 1.445                | 5.59e-07 |
| TTY15      | 0.243 vs. 0.966            | 2.40e-01 |
| PRINS      | 0.074 vs. 0.116            | 4.11e-01 |
| XIST       | 0.004 vs. 0.002            | 6.73e-01 |
| MEG3       | 1.557 vs. 0.996            | 2.39e-01 |
| H19        | 185.012 vs. 686.186        | 3.90e-02 |
| MALAT1     | 9.077 vs. 8.03             | 1.64e-12 |
| CYTOR      | 44.913 vs. 17.175          | 1.63e-12 |

**Table S3.** The expression levels of lncRNAs in HPV(+) vs. HPV(-) patients; un-paired T-test or Mann-Whitney U test. p < 0.05 considered as significant.

|            | HPV(+) vs HPV(-)<br>[mean ± SEM] | p-val   |
|------------|----------------------------------|---------|
| CDKN2B-AS1 | 66.81 ± 6.905 vs. 15.77 ± 1.915  | <0.0001 |
| TTY14      | 8.861 ± 1.882 vs. 1.652 ± 0.3215 | 0.0001  |
| TTY15      | 134.0 ± 18.47 vs. 79.93 ± 12.35  | 0.0042  |
| PRINS      | 4.488 ± 0.8757 vs. 3.324 ± 0.686 | 0.029   |
| XIST       | 42.5 ± 197.7 vs. 433.7 ± 123.5   | 0.7679  |
| MEG3       | 69.50 ± 34.96 vs. 59.73 ± 8.734  | 0.0004  |
| H19        | 10820 ± 4278 vs. 29251 ± 633     | 0.0084  |
| MALAT1     | 1964 ± 195.3 vs. 1585 ± 120.8    | 0.0810  |
| CYTOR      | 247.7 ± 37.49 vs. 284.3 ± 32.04  | 0.113   |

**Table S4.** The expression level of PRINS in HPV(-), HPV(+), and all both HPV(-) and HPV(+) HNSCC patients according to clinical-pathological parameters; un-paired T-test; p < 0.05 considered as significant.

| Parameter | HPV(-)       | HPV(+)       | ALL<br>(HPV(-) and<br>HPV(+)) |
|-----------|--------------|--------------|-------------------------------|
|           | [mean ± SEM] | [mean ± SEM] | [mean ± SEM]                  |
|           |              |              |                               |

|                            |                  |                |                |                |
|----------------------------|------------------|----------------|----------------|----------------|
| <b>Age</b>                 | <55              | 3.976 ± 1.824  | 4.904 ± 0.8498 | 4.338 ± 1.152  |
|                            | >55              | 3.228 ± 0.4314 | 4.421 ± 1.326  | 3.586 ± 0.4980 |
|                            | p-val            | 0.1754         | 0.1324         | 0.9367         |
| <b>Gender</b>              | Female           | 2.837 ± 0.7743 | 3.787 ± 2.188  | 2.995 ± 0.7226 |
|                            | Male             | 3.663 ± 0.7998 | 4.706 ± 0.9280 | 4.050 ± 0.6087 |
|                            | p-val            | 0.4464         | 0.6521         | 0.1946         |
| <b>Smoking</b>             | Yes              | 4.039 ± 0.8612 | 3.831 ± 0.5510 | 3.978 ± 0.6281 |
|                            | No               | 1.995 ± 0.3400 | 5.992 ± 2.106  | 3.573 ± 0.8984 |
|                            | p-val            | 0.0691         | 0.7728         | 0.2579         |
| <b>Alcohol consumption</b> | Yes              | 3.569 ± 0.8148 | 4.337 ± 1.099  | 3.825 ± 0.6527 |
|                            | No               | 3.315 ± 0.7937 | 4.947 ± 0.9376 | 3.840 ± 0.6247 |
|                            | p-val            | 0.6299         | 0.0989         | 0.1990         |
| <b>Grade</b>               | G1+<br>G2        | 2.926 ± 0.4346 | 3.365 ± 0.8026 | 3.015 ± 0.3809 |
|                            | G3+<br>G4        | 5.101 ± 2.208  | 6.338 ± 2.024  | 5.631 ± 1.514  |
|                            | p-val            | 0.1569         | 0.1300         | <b>0.0156</b>  |
| <b>T-stage</b>             | T1+T<br>2        | 2.218 ± 0.3501 | 3.979 ± 0.8318 | 2.941 ± 0.4167 |
|                            | T3+T<br>4        | 4.307 ± 0.9924 | 2.352 ± 0.9174 | 4.067 ± 0.8800 |
|                            | p-val            | 0.2212         | 0.1813         | 0.7882         |
| <b>N-stage</b>             | N0               | 3.076 ± 0.6522 | 3.771 ± 1.042  | 3.227 ± 0.5543 |
|                            | N1+<br>N2+<br>N3 | 3.860 ± 0.9663 | 4.866 ± 1.076  | 4.250 ± 0.7216 |
|                            | p-val            | 0.5081         | 0.8076         | 0.3604         |

|                                |       |                |                |                |
|--------------------------------|-------|----------------|----------------|----------------|
| <b>Perineural invasion</b>     | Yes   | 3.127 ± 0.4740 | 1.793 ± 0.9082 | 3.042 ± 0.4486 |
|                                | No    | 4.219 ± 1.504  | 3.324 ± 0.7869 | 3.940 ± 1.060  |
|                                | p-val | 0.6130         | 0.3447         | 0.8974         |
| <b>Angiolymphatic invasion</b> | Yes   | 2.698 ± 0.3100 | 2.937 ± 0.5081 | 2.755 ± 0.2629 |
|                                | No    | 4.431 ± 1.364  | 2.073 ± 1.061  | 4.094 ± 1.182  |
|                                | p-val | 0.7963         | 0.1927         | 0.4027         |

**Table S5.** Expression of genes associated with antiviral response and inflammatory response in HPV(+) HNSCC patients according to PRINS expression level based on TCGA data; un-paired T-test or Mann-Whitney U test.  $p < 0.05$  considered as significant.

| <b>Gene</b>    | <b>Low PRINS<br/>[mean ± SEM]</b> | <b>High PRINS<br/>[mean ± SEM]</b> | <b>p-val</b> |
|----------------|-----------------------------------|------------------------------------|--------------|
| <b>CTSS</b>    | 0.06551 ± 0.2194                  | 1.046 ± 0.3853                     | 0.0193       |
| <b>TLR8</b>    | -0.3091 ± 0.1186                  | 0.7104 ± 0.4217                    | 0.0499       |
| <b>IRF5</b>    | -0.06304 ± 0.1593                 | 0.5362 ± 0.2212                    | 0.0315       |
| <b>CCL5</b>    | -0.09860 ± 0.1441                 | 0.6168 ± 0.2683                    | 0.0167       |
| <b>CD40</b>    | 0.7695 ± 0.5067                   | 1.333 ± 0.3574                     | 0.0294       |
| <b>CARD9</b>   | 0.1301 ± 0.1872                   | 0.5753 ± 0.2273                    | 0.0385       |
| <b>PYCARD</b>  | -0.4627 ± 0.1056                  | 0.07362 ± 0.2079                   | 0.0315       |
| <b>PSTPIP1</b> | 0.2176 ± 0.3614                   | 0.7888 ± 0.2799                    | 0.0439       |
| <b>MAVS</b>    | -0.3029 ± 0.1992                  | 0.5812 ± 0.2314                    | 0.0062       |
| <b>IFNAR1</b>  | -0.2207 ± 0.2215                  | 0.8031 ± 0.3413                    | 0.0133       |
| <b>IGF1</b>    | -0.3198 ± 0.04003                 | -0.1609 ± 0.05973                  | 0.0193       |
| <b>IL2</b>     | 0.1516 ± 0.1857                   | 1.449 ± 0.6512                     | 0.0359       |
| <b>CXCL5</b>   | -0.1227 ± 0.02848                 | -0.1885 ± 0.007108                 | 0.0468       |
| <b>CCL21</b>   | 0.1003 ± 0.2905                   | 0.04864 ± 0.1800                   | 0.0468       |
| <b>CCR2</b>    | -0.2963 ± 0.1196                  | 0.3550 ± 0.2659                    | 0.0337       |
| <b>CCR7</b>    | 0.7152 ± 0.4145                   | 1.312 ± 0.3078                     | 0.0411       |

|             |                      |                     |        |
|-------------|----------------------|---------------------|--------|
| <b>GZMA</b> | $-0.1237 \pm 0.1679$ | $0.5555 \pm 0.2758$ | 0.0468 |
|-------------|----------------------|---------------------|--------|

**Table S6.** The expression level of PRINS in the HPV(-), HPV(+), HPV+(DNA+/RNA+) and HPV+(DNA+/RNA-) HNSCC patients according to clinical-pathological parameters based on GSE65858 data set; ND - no data; un-paired T-test or one way ANOVA with post test;  $p < 0.05$  considered as significant.

|                                | <b>Parameter</b> | <b>HPV(-)<br/>[mean <math>\pm</math> SEM]</b> | <b>HPV(+)<br/>[mean <math>\pm</math> SEM]</b> | <b>HPV+<br/>(DNA+/RNA+)<br/>[mean <math>\pm</math> SEM]</b> | <b>HPV+<br/>(DNA+/RNA-)<br/>[mean <math>\pm</math> SEM]</b> |
|--------------------------------|------------------|-----------------------------------------------|-----------------------------------------------|-------------------------------------------------------------|-------------------------------------------------------------|
| <b>Age</b>                     | <60              | 6.958 $\pm$ 0.025                             | 6.991 $\pm$ 0.040                             | 6.993 $\pm$ 0.061                                           | 6.87 $\pm$ 0.079                                            |
|                                | >60              | 6.966 $\pm$ 0.027                             | 7.065 $\pm$ 0.048                             | 7.137 $\pm$ 0.071                                           | 6.9 $\pm$ 0.067                                             |
|                                | p-val            | 0.834                                         | 0.232                                         | 0.087                                                       | 0.782                                                       |
| <b>Gender</b>                  | Female           | 6.953 $\pm$ 0.043                             | 7.038 $\pm$ 0.075                             | 7.078 $\pm$ 0.122                                           | 6.786 $\pm$ 0.087                                           |
|                                | Male             | 7.009 $\pm$ 0.020                             | 7.018 $\pm$ 0.033                             | 7.075 $\pm$ 0.048                                           | 6.902 $\pm$ 0.058                                           |
|                                | p-val            | 0.286                                         | 0.787                                         | 0.978                                                       | 0.712                                                       |
| <b>Smoking</b>                 | Yes              | 6.993 $\pm$ 0.020                             | 7.023 $\pm$ 0.062                             | 7.076 $\pm$ 0.053                                           | 6.879 $\pm$ 0.063                                           |
|                                | No               | 6.956 $\pm$ 0.044                             | 7.023 $\pm$ 0.035                             | 7.08 $\pm$ 0.095                                            | 6.894 $\pm$ 0.096                                           |
|                                | p-val            | 0.493                                         | 0.995                                         | 0.967                                                       | 0.898                                                       |
| <b>Alcohol<br/>consumption</b> | Yes              | 6.993 $\pm$ 0.020                             | 7.017 $\pm$ 0.033                             | 7.086 $\pm$ 0.053                                           | 6.883 $\pm$ 0.054                                           |
|                                | No               | 6.958 $\pm$ 0.060                             | 7.06 $\pm$ 0.077                              | 7.041 $\pm$ 0.101                                           | ND                                                          |
|                                | p-val            | 0.555                                         | 0.633                                         | 0.705                                                       | ND                                                          |
| <b>UICC stage</b>              | I-III            | 6.977 $\pm$ 0.030                             | 6.953 $\pm$ 0.070                             | 6.953 $\pm$ 0.109                                           | 6.906 $\pm$ 0.105                                           |
|                                | IV               | 6.952 $\pm$ 0.023                             | 7.044 $\pm$ 0.034                             | 7.12 $\pm$ 0.048                                            | 6.874 $\pm$ 0.060                                           |
|                                | p-val            | 0.506                                         | 0.206                                         | 0.051                                                       | 0.765                                                       |
| <b>T-stage</b>                 | T1+T2            | 6.955 $\pm$ 0.027                             | 7.029 $\pm$ 0.046                             | 7.021 $\pm$ 0.071                                           | 6.902 $\pm$ 0.083                                           |
|                                | T3+T4            | 6.965 $\pm$ 0.025                             | 7.017 $\pm$ 0.041                             | 7.152 $\pm$ 0.049                                           | 6.871 $\pm$ 0.068                                           |
|                                | p-val            | 0.791                                         | 0.848                                         | 0.059                                                       | 0.770                                                       |
| <b>N-stage</b>                 | N0               | 6.962 $\pm$ 0.029                             | 6.936 $\pm$ 0.062                             | 6.851 $\pm$ 0.076                                           | 6.943 $\pm$ 0.105                                           |
|                                | N1+N2+N3         | 6.961 $\pm$ 0.023                             | 7.042 $\pm$ 0.034                             | 7.115 $\pm$ 0.050                                           | 6.857 $\pm$ 0.058                                           |
|                                | p-val            | 0.840                                         | 0.186                                         | <b>0.044</b>                                                | 0.467                                                       |
| <b>Cancer type</b>             | Atypical         | 7.077 $\pm$ 0.052                             | 7.091 $\pm$ 0.042                             | 7.094 $\pm$ 0.055                                           | 6.913 $\pm$ 0.051                                           |
|                                | Basal            | 6.983 $\pm$ 0.030                             | 6.995 $\pm$ 0.072                             | 6.966 $\pm$ 0.157                                           | 6.971 $\pm$ 0.159                                           |
|                                | Classical        | 7.031 $\pm$ 0.036                             | 6.959 $\pm$ 0.133                             | ND                                                          | 6.877 $\pm$ 0.149                                           |

|             |               |               |               |               |
|-------------|---------------|---------------|---------------|---------------|
| Mesenchymal | 6.848 ± 0.038 | 6.913 ± 0.056 | 7.056 ± 0.102 | 6.829 ± 0.082 |
| p-val       | <0.0001       | 0.100         | 0.781         | 0.748         |

**Table S7.** Expression of genes associated with antiviral response and inflammatory response in HPV+ (DNA+/RNA+) and HPV+ (DNA+/RNA-) HNSCC patients according to PRINS expression level; un-paired T-test or Mann-Whitney U test. p < 0.05 considered as significant.

| Gene    | HPV+ (DNA+/RNA+)          |                            |          | HPV+ (DNA+/RNA-)          |                            |          |
|---------|---------------------------|----------------------------|----------|---------------------------|----------------------------|----------|
|         | Low PRINS<br>[mean ± SEM] | High PRINS<br>[mean ± SEM] | p-val    | Low PRINS<br>[mean ± SEM] | High PRINS<br>[mean ± SEM] | p-val    |
| CTSS    | 6.947 ± 0.05971           | 6.752 ± 0.02964            | 0.049555 | 6.739 ± 0.07882           | 6.560 ± 0.07528            | 0.967068 |
| TLR8    | 6.433 ± 0.03290           | 6.329 ± 0.01647            | 0.003138 | 6.392 ± 0.02920           | 6.310 ± 0.03734            | 0.126616 |
| IRF5    | 6.956 ± 0.1123            | 7.019 ± 0.1116             | 0.608948 | 6.796 ± 0.08950           | 6.799 ± 0.08497            | 0.901427 |
| CCL5    | 10.48 ± 0.1839            | 10.08 ± 0.2184             | 0.203840 | 9.068 ± 0.2406            | 9.377 ± 0.4534             | 0.710209 |
| CD40    | 6.867 ± 0.04359           | 6.759 ± 0.03042            | 0.102314 | 6.738 ± 0.05494           | 6.715 ± 0.04476            | 0.967068 |
| CARD9   | 7.371 ± 0.1035            | 7.267 ± 0.09957            | 0.399998 | 7.079 ± 0.1345            | 7.144 ± 0.1476             | 0.710209 |
| PYCARD  | 7.080 ± 0.05669           | 6.956 ± 0.05827            | 0.137459 | 6.979 ± 0.05523           | 7.086 ± 0.05994            | 0.200592 |
| PSTPIP1 | 6.781 ± 0.06053           | 6.717 ± 0.06409            | 0.418734 | 6.648 ± 0.06484           | 6.644 ± 0.1194             | 0.710209 |
| MAVS    | 6.751 ± 0.03083           | 6.808 ± 0.03849            | 0.346890 | 6.929 ± 0.05850           | 6.925 ± 0.08645            | 0.967068 |
| IFNAR1  | 7.849 ± 0.04888           | 7.834 ± 0.06572            | 0.881931 | 7.658 ± 0.09744           | 7.791 ± 0.09238            | 0.302001 |
| IGF1    | 6.600 ± 0.04231           | 6.509 ± 0.05539            | 0.116944 | 6.820 ± 0.1647            | 6.572 ± 0.09475            | 0.482764 |
| CXCL5   | 6.720 ± 0.1246            | 6.660 ± 0.04850            | 0.437977 | 7.203 ± 0.2645            | 6.784 ± 0.2316             | 0.090508 |
| CCL21   | 7.396 ± 0.2294            | 7.273 ± 0.2215             | 0.655911 | 8.130 ± 0.4038            | 7.184 ± 0.2243             | 0.090508 |
| CCR7    | 8.003 ± 0.1600            | 7.656 ± 0.1765             | 0.109436 | 7.693 ± 0.3671            | 7.196 ± 0.3835             | 0.482764 |
| GZMA    | 9.036 ± 0.1931            | 8.586 ± 0.1444             | 0.049555 | 7.980 ± 0.2833            | 7.869 ± 0.2736             | 0.649723 |
